# Supplementary material for: Long Non-coding RNA PEBP1P2 Suppresses Proliferative VSMCs Phenotypic Switching and Proliferation in Atherosclerosis
Source: PubMed Central journal article supplement — Mol Ther Nucleic Acids. 2020 Aug 19;22:84–98. doi: 10.1016/j.omtn.2020.08.013 (PMC7490454; doi:10.1016/j.omtn.2020.08.013), 2020-08-19
Supplement: mmc1.pdf [file mmc1.pdf]

**OMTN, Volume 22**

**Supplemental Information**

**Long Non-coding RNA PEBP1P2 Suppresses  
Proliferative VSMCs Phenotypic Switching  
and Proliferation in Atherosclerosis**

**Xingqiang He, Zhexun Lian, Yanyan Yang, Zhibin Wang, Xiuxiu Fu, Yan Liu, Min Li, Jiawei Tian, Tao Yu, and Hui Xin**

**Supplemental Information**

**Long Non-coding RNA PEBP1P2 Suppresses Proliferative VSMCs Phenotypic Switching and Proliferation in Atherosclerosis**

Xingqiang He, Zhexun Lian, Yanyan Yang, Zhibin Wang, Xiuxiu Fu, Yan Liu, Min Li, Jiawei Tian,

Tao Yu, Hui Xin.

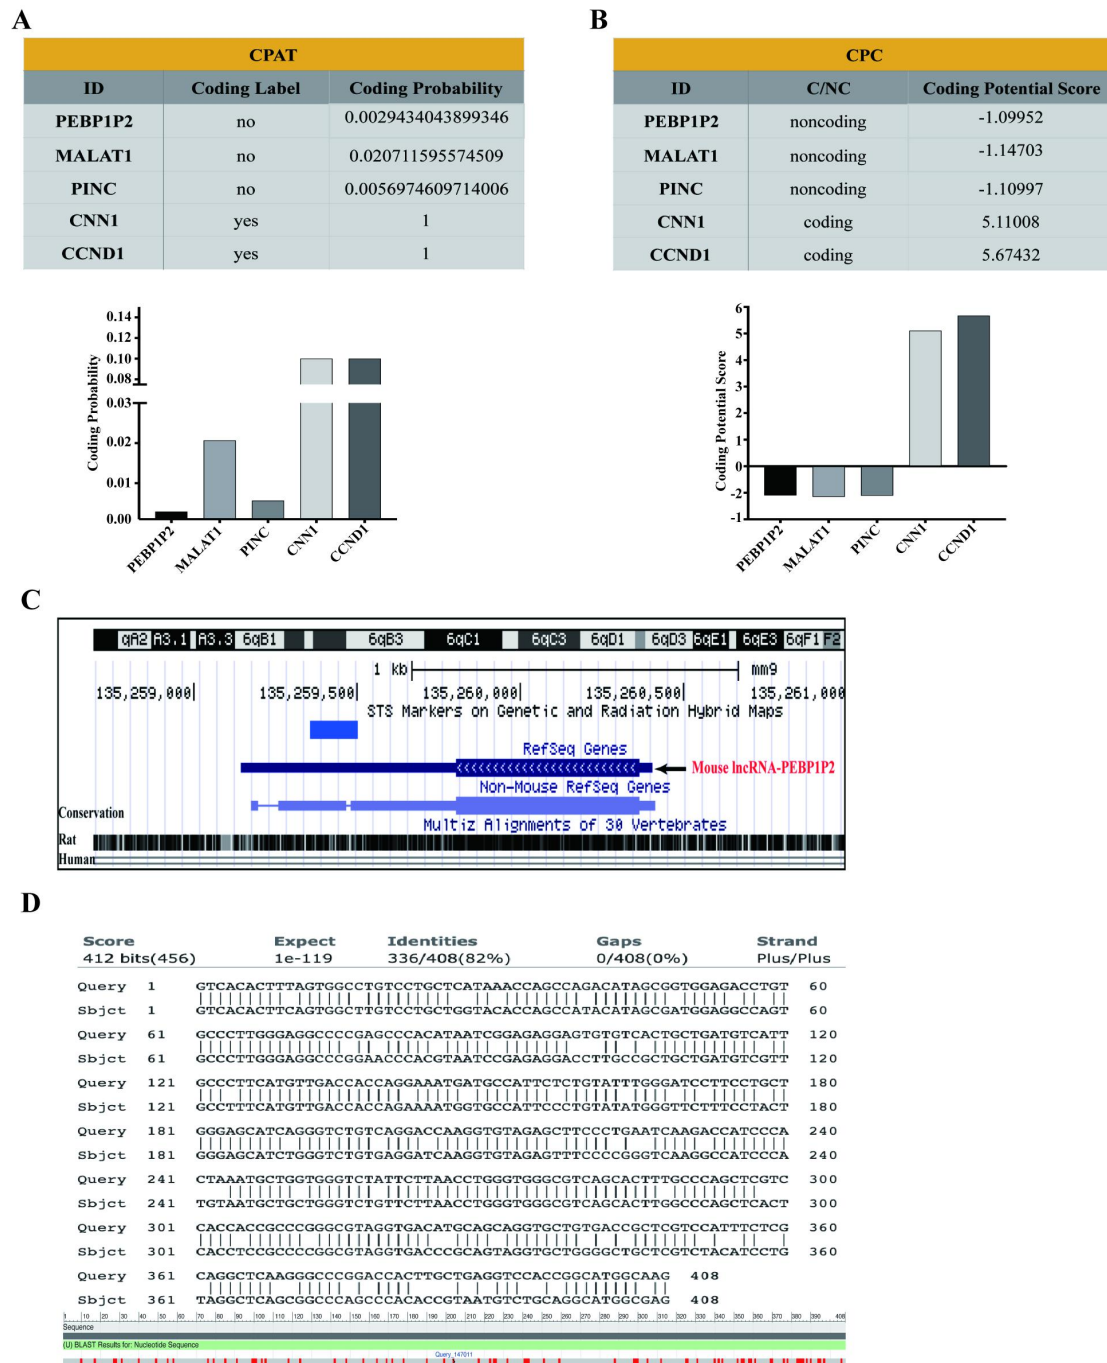

**Figure S1. The characterization of PEBP1P2 in coding possibility and conservatism.** (A and B) The coding-potential assessment (CPAT, <http://lilab.research.bcm.edu/cpat/index.php>) and coding potential calculator (CPC, <http://cpc.cbi.pku.edu.cn/>) tools were used to predict the coding probability of PEBP1P2. MALAT1 and PINC served as the long non-coding RNA controls, while CNN1 and CCND1 served as the coding RNA controls. (C) Genomic location of PEBP1P2 on mouse assembly (2007) predicted by UCSC LiftOver tool. (D) The NCBI BLAST tool was used to sequence comparison between human and rat PEBP1P2.

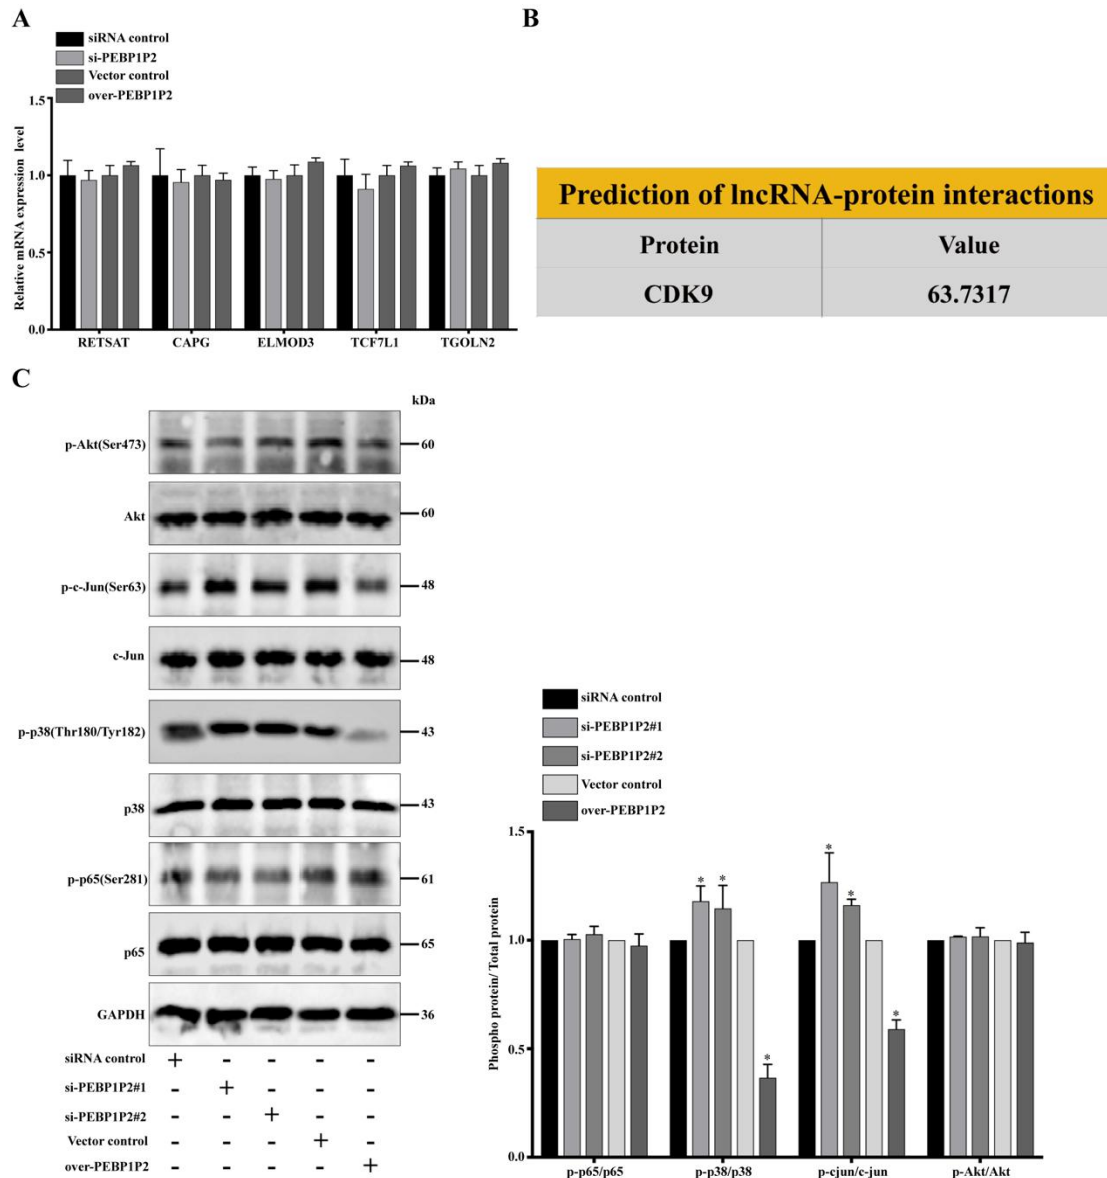

**Figure S2. PEBP1P2 may work in trans.** (A) The mRNA expression level of PEBP1P2 neighbor genes after PEBP1P2 knockdown or overexpression in VSMCs were measured by qRT-PCR. (B) The prediction of lncRNA-protein interactions tool (<http://bioinfo.bjmu.edu.cn/lncpro/#>) was used to predict the potential PEBP1P2/ CDK9 interaction. (C) Detection of PEBP1P2 knockdown or overexpression on the protein expression of NF- $\kappa$ B p65, p-NF- $\kappa$ B p65, p38MAPK, p-p38MAPK, c-Jun, p-c-Jun, Akt, and p-Akt by western blot. Data are presented as mean  $\pm$  SD. n=3. \* $P$  < 0.05 vs Ctl.

**Table S1. General Characteristics of the CHD Patients and Healthy People.**

| Clinical parameters    | Control (n=29) | CHD (n=27)             | P       |
|------------------------|----------------|------------------------|---------|
| Age, year              | 24.21 ± 2.04   | 69.67 ± 8.85*          | < 0.001 |
| Male, %                | 15 (51.7)      | 18 (66.7)              | 0.26    |
| BMI, kg/m <sup>2</sup> | 21.41 ± 2.42   | 23.15 ± 2.93*          | 0.019   |
| SBP, mmHg              | 118 ± 8.96     | 142.15 ± 23.82*        | < 0.001 |
| DBP, mmHg              | 62.97 ± 3.28   | 85.26 ± 15.72*         | < 0.001 |
| CHO, mmol/L            | 3.72 ± 0.94    | 4.60 ± 1.28*           | 0.005   |
| HDL, mmol/L            | 2.20 ± 0.34    | 1.20 ± 0.35*           | < 0.001 |
| LDL, mmol/L            | 0.92 ± 0.49    | 2.84 ± 1.00*           | < 0.001 |
| TG, mmol/L             | 1.20 ± 1.00    | 1.71 ± 0.91            | 0.050   |
| Hypertension, %        | 0 (0)          | 16 (59.3) <sup>#</sup> | < 0.001 |
| Smoking, %             | 8 (27.6)       | 15 (55.6) <sup>#</sup> | 0.035   |

BMI, body mass index; SBP, systolic blood pressure; DBP, diastolic blood pressure; CHO, cholesterol; HDL, high-density lipoprotein; LDL, low-density lipoprotein; TG, triglyceride. P value is calculated with t-test (\*) or Mann-Whitney test (#) to compare continuous variables (presented as mean ± SD) or categorical variables (presented as no. (%)), respectively. \**p* < 0.05 vs Ctl, #*p* < 0.05 vs Ctl.

**Table S2. siRNA sequences.**

| <b>siRNA Names</b>      | <b>Sequences (5'→3')</b> |
|-------------------------|--------------------------|
| siRNA Control sense     | UUCUCCGAACGUGUCACGUTT    |
| siRNA Control antisense | ACGUGACACGUUCGGAGAATT    |
| si-PEBP1P2 #1 sense     | GCUCAUAAACCAGCCAGACTT    |
| si-PEBP1P2 #1 antisense | GUCUGGCUGGUUUAUGAGCTT    |
| si-PEBP1P2 #2 sense     | CCAUUUCUCGCAGGCUCAATT    |
| si-PEBP1P2 #2 antisense | UUGAGCCUGCGAGAAAUGGTT    |
| si-CDK9 #1 sense        | GGGAGAUCAAGAUCUUCATT     |
| si-CDK9 #1 antisense    | UGAAGGAUCUUGAUCUCCCTT    |
| si-CDK9 #2 sense        | GCUGCAAGGGUAGUAUAUATT    |
| si-CDK9 #2 antisense    | UAUAUACUACCCUUGCAGCTT    |

**Table S3. Primer Sequences for qRT-PCR**

| <b>Primer Names</b>       | <b>Sequences (5'→3')</b>  |
|---------------------------|---------------------------|
| Hu-GAPDH Forward          | GTCTCCTCTGACTTCAACAGCG    |
| Hu-GAPDH Reverse          | ACCACCCTGTTGCTGTAGCCAA    |
| Ra-Gapdh Forward          | GCCCATCACCATCTTCCAGGAG    |
| Ra-Gapdh Reverse          | GAAGGGGCGGAGATGATGAC      |
| Hu/Ra-PEBP1P2 Forward     | ACTTTAGTGGCCTGTCCTGCTCA   |
| Hu/Ra-PEBP1P2 Reverse     | TGACGCCACCCAGGTTAAGAATA   |
| Hu-CCDN1 Forward          | TCTACACCGACA ACTCCATCCG   |
| Hu-CCDN1 Reverse          | TCTGGCATT TTTGGAGAGGAAGTG |
| Hu- $\alpha$ -SMA Forward | GTGTTGCCCTGAAGAGCAT       |
| Hu- $\alpha$ -SMA Reverse | GCTGGGACATTGAAAGTCTCA     |
| Hu-CNN1 Forward           | CCAACGACCTGTTTGAGAACACC   |
| Hu-CNN1 Reverse           | ATTTCCGCTCCTGCTTCTCTGC    |
| Hu-SMHC Forward           | CGCCAAGAGACTCGTCTGG       |
| Hu-SMHC Reverse           | TCTTTCCAACCGTGACCTTC      |
| Hu-CDK9 Forward           | CCATTACAGCCTTGCGGGAGAT    |
| Hu-CDK9 Reverse           | CAGCAAGGTCATGCTCGCAGAA    |
| Hu-RETSAT Forward         | GAAGAGGCTGCGGAACACATCC    |
| Hu-RETSAT Reverse         | CCTCAAACCACTCGTAGGCAGT    |
| Hu-CAPG Forward           | CAGGTGGAGATTGTCACTGATGG   |
| Hu-CAPG Reverse           | CTGGGCATTTGCCTTGT CAGCT   |
| Hu-ELMOD3 Forward         | CGGCTCCAAGTTT GACTGTGCC   |
| Hu-ELMOD3 Reverse         | GAGTCCATCACCAGGTAGAGCA    |
| Hu-TCF7L1 Forward         | TCGTCCCTGGTCAACGAGT       |
| Hu-TCF7L1 Reverse         | ACTTCGGCGAAATAGTCCCG      |
| Hu-TGOLN2 Forward         | GGAGAGCAGCCACTTCTTTGCA    |
| Hu-TGOLN2 Reverse         | CCAAACGTTGGTAGTCACTGGC    |
